# Supplementary material for: In Vitro Cytotoxic Effect of 2-(Morpholin-4-Yl)-4,5-Bis(2’’,2’’,2’’-Trinitroethoxy)-1,3,5-Triazine on Human Fibroblasts, Peripheral Blood Mononuclear Cells and Breast Cancer Cells
Source: Preprints.org preprint supplement (doi:10.20944/preprints202111.0403.v1), 2021-11-22
Supplement: Supplementary file 2 [file supplementary]

## Sheet: Лист1
2-(morpholin-4’-yl)-4,6-bis(2’’,2’’,2’’-trinitroethoxy)-1,3,5-triazine
MTT
		Fibroblasts				ВТ474				PBMC																	Fibroblasts				ВТ474				PBMC					Fibroblasts				ВТ474
5000		66.774	4.1902			32.6903	6.35005		5000	65.7067	3.87732						66.774	65.7067	32.6903			Pearson correlation			Spearman correlation		0.15	101.198			2	95.2661			2	107.206				%	СО%								2
2500		75.2151	5.41905			38.4963	9.5955		2500	75.2188	2.21283						75.2151	75.2188	38.4963			0.935001			0.892857		50.6535	102.374			2.16448	94.407			52.4848	105.584				61.0444	4.37303	5000		34.56	1.76493	5000			52.4848
1000		85.7253	7.70995	7.23006		61.4901	7.93604	6.23804	1000	85.4847	3.29772	2.52979					85.7253	85.4847	61.4901			P-value			P-value		101.157	101.202			2.34248	93.6441			102.97	103.834				88.0526	2.51612	2500		51.5226	2.95909	2500			102.97
100		104.254	9.84085	4.01751		106.501	9.80623	4.00338	100	87.7878	5.17635	2.07199					104.254	87.7878	106.501			0.999001			0.996596		151.661	99.8238			2.53512	92.9668			153.455	101.951				96.112	1.61042	1000		68.4301	2.00094	1000			153.455
50						99.452	10.456		50								106.347	88.2448	108.026			95% CI			95% CI		202.164	98.4896			2.7436	92.3656			203.939	99.9294				104.834	6.25307	100		81.4647	5.09853	100			203.939
20		106.347	7.40924	7.10729		108.026	3.68775	1.50552	20	88.2448	5.02647	7.76753					104.337	90.1643	107.477			0.614901			0.426702		252.668	97.244			2.96923	91.8318			254.424	97.7696				91.367	5.07514	20		84.3715	8.95301	20			254.424
4		104.337	6.10065	4.94007		107.477	2.51798	2.21147	4	90.1643	3.51882	2.62006					106.237	95.307	109.134			0.990581			0.984179		303.171	96.0896			3.21341	91.358			304.909	95.475				92.3986	6.23745	4		83.805	4.48963	4			304.909
2		106.237	7.81734	3.74193		109.134	5.8579	2.39148	2	95.307	3.33523	3.3616															353.675	95.019			3.47767	90.9375			355.394	93.0542				104.924	4.00337	2		83.7769	3.07306	2			355.394
0.15		98.7116	6.38672	6.68985																							404.178	94.0229			3.76367	90.5644			405.879	90.5216													405.879
																											454.682	93.0927			4.07318	90.2335			456.364	87.8977													456.364
																											505.185	92.2206			4.40815	89.9399			506.848	85.2083													506.848
																											555.689	91.4			4.77066	89.6797			557.333	82.4838													557.333
																											606.192	90.6253			5.16299	89.449			607.818	79.7571				Pearson correlation				Pearson correlation					607.818
																											656.696	89.8916			5.58758	89.2446			658.303	77.061				0.78419				0.956931					658.303
																											707.199	89.1948			6.04709	89.0637			708.788	74.4264				P-value				P-value					708.788
																											757.703	88.5315			6.54439	88.9036			759.273	71.8798				0.981573				0.999639					759.273
																											808.207	87.8984			7.08259	88.762			809.758	69.4427				95% CI				95% CI					809.758
																											858.71	87.293			7.66504	88.637			860.242	67.13				0.0760313				0.729743					860.242
																											909.214	86.713			8.2954	88.5267			910.727	64.9514				0.966494				0.993819					910.727
																											959.717	86.1562			8.97759	88.4295			961.212	62.9109													961.212
																											1010.22	85.6209			9.71589	88.344			1011.7	61.0084													1011.7
																											1060.72	85.1055			10.5149	88.2691			1062.18	59.2407													1062.18
																											1111.23	84.6085			11.3796	88.2034			1112.67	57.602													1112.67
																											1161.73	84.1287			12.3155	88.1462			1163.15	56.0852													1163.15
																											1212.23	83.6648			13.3282	88.0964			1213.64	54.6822													1213.64
																											1262.74	83.216			14.4243	88.0534			1264.12	53.3849													1264.12
																											1313.24	82.7812			15.6106	88.0164			1314.61	52.1849													1314.61
																											1363.75	82.3595			16.8943	87.9849			1365.09	51.0742													1365.09
																											1414.25	81.9503			18.2837	87.9583			1415.58	50.0452													1415.58
																											1464.75	81.5528			19.7873	87.9362			1466.06	49.0908													1466.06
																											1515.26	81.1663			21.4145	87.9181			1516.55	48.2045													1516.55
																											1565.76	80.7902			23.1756	87.9037			1567.03	47.3803													1567.03
																											1616.26	80.4241			25.0815	87.8926			1617.52	46.6126													1617.52
																											1666.77	80.0673			27.1442	87.8846			1668	45.8966													1668
																											1717.27	79.7195			29.3764	87.8795			1718.48	45.2277													1718.48
																											1767.77	79.3801			31.7923	87.877			1768.97	44.602													1768.97
																											1818.28	79.0488			34.4068	87.8768			1819.45	44.0156													1819.45
																											1868.78	78.7253			37.2364	87.8789			1869.94	43.4653													1869.94
																											1919.28	78.4091			40.2986	87.8831			1920.42	42.9482													1920.42
																											1969.79	78.0999			43.6126	87.8892			1970.91	42.4615													1970.91
																											2020.29	77.7975			47.1992	87.8971			2021.39	42.0027													2021.39
																											2070.79	77.5015			51.0808	87.9067			2071.88	41.5698													2071.88
																											2121.3	77.2117			55.2816	87.9178			2122.36	41.1607													2122.36
																											2171.8	76.9279			59.8278	87.9303			2172.85	40.7735													2172.85
																											2222.31	76.6497			64.7479	87.9442			2223.33	40.4067													2223.33
																											2272.81	76.377			70.0726	87.9592			2273.82	40.0588													2273.82
																											2323.31	76.1096			75.8352	87.9753			2324.3	39.7284													2324.3
																											2373.82	75.8472			82.0717	87.9924			2374.79	39.4142													2374.79
																											2424.32	75.5897			88.8211	88.0101			2425.27	39.1152													2425.27
																											2474.82	75.337			96.1255	88.0285			2475.76	38.8304													2475.76
																											2525.33	75.0887			104.031	88.0472			2526.24	38.5587													2526.24
																											2575.83	74.8449			112.586	88.0661			2576.73	38.2993													2576.73
																											2626.33	74.6052			121.845	88.0849			2627.21	38.0514													2627.21
																											2676.84	74.3697			131.865	88.1033			2677.7	37.8144													2677.7
																											2727.34	74.1381			142.709	88.121			2728.18	37.5874													2728.18
																											2777.84	73.9104			154.445	88.1375			2778.67	37.37													2778.67
																											2828.35	73.6863			167.146	88.1523			2829.15	37.1615													2829.15
																											2878.85	73.4659			180.892	88.1651			2879.64	36.9615													2879.64
																											2929.36	73.2489			195.768	88.1752			2930.12	36.7693													2930.12
																											2979.86	73.0352			211.868	88.1818			2980.61	36.5846													2980.61
																											3030.36	72.8249			229.291	88.1842			3031.09	36.407													3031.09
																											3080.87	72.6177			248.148	88.1816			3081.58	36.2361													3081.58
																											3131.37	72.4136			268.555	88.1729			3132.06	36.0714													3132.06
																											3181.87	72.2125			290.64	88.157			3182.55	35.9128													3182.55
																											3232.38	72.0143			314.542	88.1326			3233.03	35.7598													3233.03
																											3282.88	71.819			340.409	88.0982			3283.52	35.6121													3283.52
																											3333.38	71.6263			368.403	88.0523			3334	35.4696													3334
																											3383.89	71.4364			398.7	87.993			3384.48	35.3319													3384.48
																											3434.39	71.249			431.488	87.9183			3434.97	35.1988													3434.97
																											3484.89	71.0642			466.972	87.826			3485.45	35.0701													3485.45
																											3535.4	70.8819			505.375	87.7136			3535.94	34.9455													3535.94
																											3585.9	70.7019			546.936	87.5783			3586.42	34.8249													3586.42
																											3636.4	70.5243			591.915	87.4172			3636.91	34.7081													3636.91
																											3686.91	70.349			640.592	87.2269			3687.39	34.5949													3687.39
																											3737.41	70.1759			693.273	87.004			3737.88	34.4852													3737.88
																											3787.92	70.005			750.286	86.7446			3788.36	34.3788													3788.36
																											3838.42	69.8362			811.988	86.4446			3838.85	34.2755													3838.85
																											3888.92	69.6695			878.764	86.0996			3889.33	34.1753													3889.33
																											3939.43	69.5048			951.031	85.705			3939.82	34.0779													3939.82
																											3989.93	69.3421			1029.24	85.2561			3990.3	33.9833													3990.3
																											4040.43	69.1813			1113.88	84.7479			4040.79	33.8914													4040.79
																											4090.94	69.0224			1205.49	84.1754			4091.27	33.802													4091.27
																											4141.44	68.8653			1304.62	83.5339			4141.76	33.715													4141.76
																											4191.94	68.71			1411.91	82.8187			4192.24	33.6304													4192.24
																											4242.45	68.5565			1528.03	82.0256			4242.73	33.548													4242.73
																											4292.95	68.4047			1653.69	81.1513			4293.21	33.4678													4293.21
																											4343.45	68.2546			1789.68	80.1932			4343.7	33.3897													4343.7
																											4393.96	68.1062			1936.86	79.1507			4394.18	33.3136													4394.18
																											4444.46	67.9594			2096.14	78.0249			4444.67	33.2394													4444.67
																											4494.96	67.8141			2268.53	76.8197			4495.15	33.167													4495.15
																											4545.47	67.6704			2455.08	75.5427			4545.64	33.0964													4545.64
																											4595.97	67.5282			2656.98	74.2059			4596.12	33.0276													4596.12
																											4646.48	67.3875			2875.49	72.8276			4646.61	32.9604													4646.61
																											4696.98	67.2483			3111.96	71.4332			4697.09	32.8948													4697.09
																											4747.48	67.1105			3367.88	70.0579			4747.58	32.8308													4747.58
																											4797.99	66.9741			3644.85	68.7485			4798.06	32.7683													4798.06
																											4848.49	66.839			3944.59	67.5667			4848.55	32.7072													4848.55
																											4898.99	66.7053			4268.99	66.5924			4899.03	32.6474													4899.03
																											4949.5	66.573			4620.06	65.928			4949.52	32.5891													4949.52
																											5000	66.4419			5000	65.7035			5000	32.532													5000
[truncated: 12 more columns]
